# Supplementary material for: A coordination polymer supramolecular isomer formed from a single building block: an unexpected porphyrin ribbon constructed from zinc(tetra(4-pyridyl)porphyrin)
Source: Royal Society of Chemistry journal article supplement (doi:10.1039/b515083n), 2005-01-01
Supplement: b515083n.pdf [file b515083n.pdf]

**A Coordination Polymer Supramolecular Isomer Formed From A Single Building-block:  
An Unexpected Porphyrin Ribbon constructed from Zinc(tetra(4-pyridyl)porphyrin)**

**Supplementary Material**

David J. Ring, M. Carla Aragoni, Neil R. Champness\* and Claire Wilson

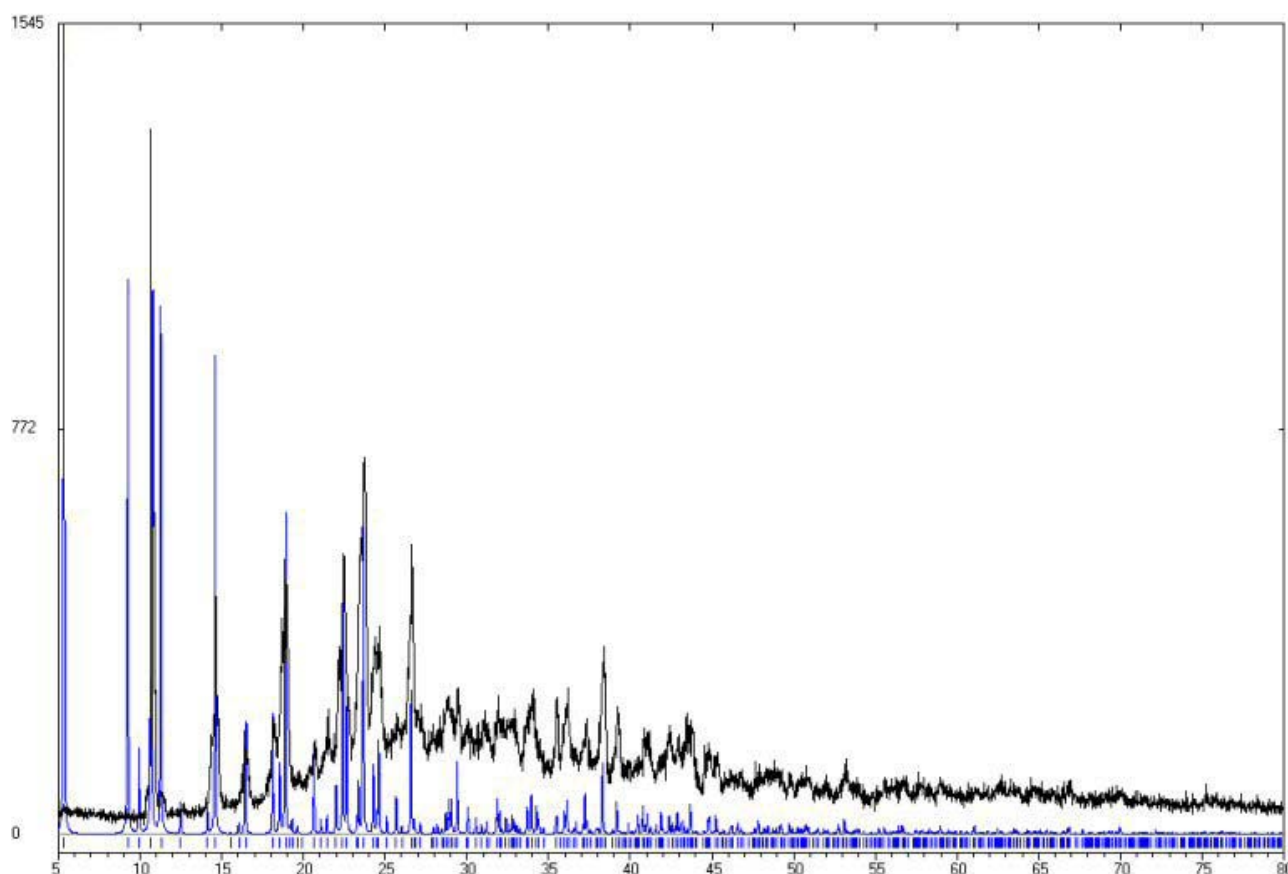

Powder X-ray diffraction pattern showing experimental data (black line) from ground sample containing crystals of **1** and calculated powder diffraction pattern for compound **2** (blue line). It can be seen that the crystalline phase is consistent with compound **1** and no additional crystalline material, notably for **1**, is observed. However, the broad base-line absorption indicates a significant level of amorphous material consistent with the degradation of **1** upon solvent loss.

**Synthesis**

Electronic Supplementary Material for CrystEngComm

This journal is © The Royal Society of Chemistry 2005

[Zn(tpyp)] (10.0mg, 1.46mmol) was dissolved in CHCl<sub>3</sub> (2cm<sup>3</sup>) to give a purple solution. MeOH (2cm<sup>3</sup>) was layered over this solution and then the combined CHCl<sub>3</sub>/MeOH mixture was left to evaporate. After ca. 4 weeks crystals of both **1** and **2** were formed. (Found: C, 61.73; H, 4.13; N, 14.12. Calc. for C<sub>40</sub>H<sub>24</sub>N<sub>8</sub>Zn.0.66(CHCl<sub>3</sub>).2.33(CH<sub>3</sub>OH), i.e. C<sub>43</sub>H<sub>34</sub>Cl<sub>2</sub>N<sub>8</sub>O<sub>2.33</sub>Zn: C, 61.75; H, 4.07; N, 13.40%). The single crystal X-ray structures of both **1** and **2** indicate disordered solvent content in the pores formed within the structures Thus non-specific relative amounts of CHCl<sub>3</sub> and MeOH solvent are expected in the CHN analysis of the mixture of products, the values quoted give the best fit for the experimental data. IR (KBr)/cm<sup>-1</sup>: 2996w, 2359m, 2343m, 1593s, 1540w, 1485w, 1407m, 1342m, 1204m, 1076m, 994s, 891m, 854m, 837w, 794s.
